# Supplementary material for: Rapid fabrication of solid-state nanopores with high reproducibility over a large area using a helium ion microscope
Source: Royal Society of Chemistry journal article supplement (doi:10.1039/c7nr08406d), 2018-01-01
Supplement: c7nr08406d1.pdf [file c7nr08406d1.pdf]

Electronic Supplementary Information (ESI) for Nanoscale.

**Rapid fabrication of solid-state nanopore with high  
reproducibility using helium ion microscope over a large area**

*Deying Xia\*, Chuong Huynh, Shawn McVey, Aaron Kobler Lewis A. Stern, Zhishan Yuan,  
and Xinsheng Sean Ling\**

Dr. Deying Xia, Chuong Huynh, Shawn McVey, Dr. Aaron Kobler, Lewis, A. Stern

Ion Microscopy Innovation Center

Carl Zeiss Microscopy LLC

One Corporation Way

Peabody, MA 01960 (USA)

deying.xia@zeiss.com

Dr. Zhishan Yuan

School of Mechanical Engineering

Southeast University and NJRI, Inc.

Nanjing, China

Professor Xinsheng Sean Ling

School of Mechanical Engineering

Southeast University

Nanjing, China

Department of Physics

Brown University,

Providence, RI 02912 USA

Email: Xinsheng\_Ling@brown.edu

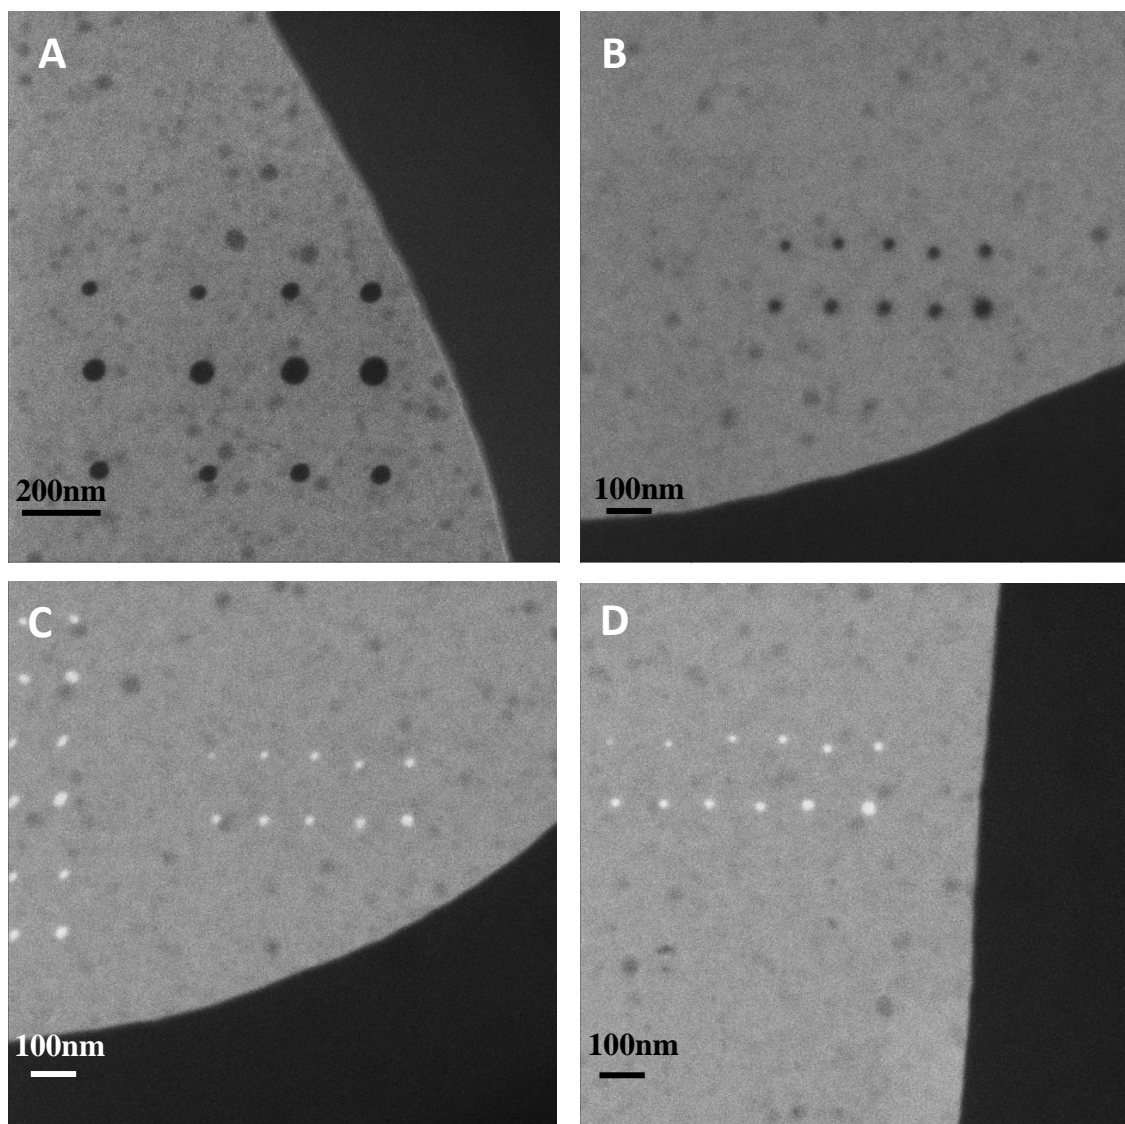

Figure S1. HIM images to test the nanopore exposure time series: (A)-(B) dirty samples; (C)-(D) clean samples after oxygen plasma cleaning.

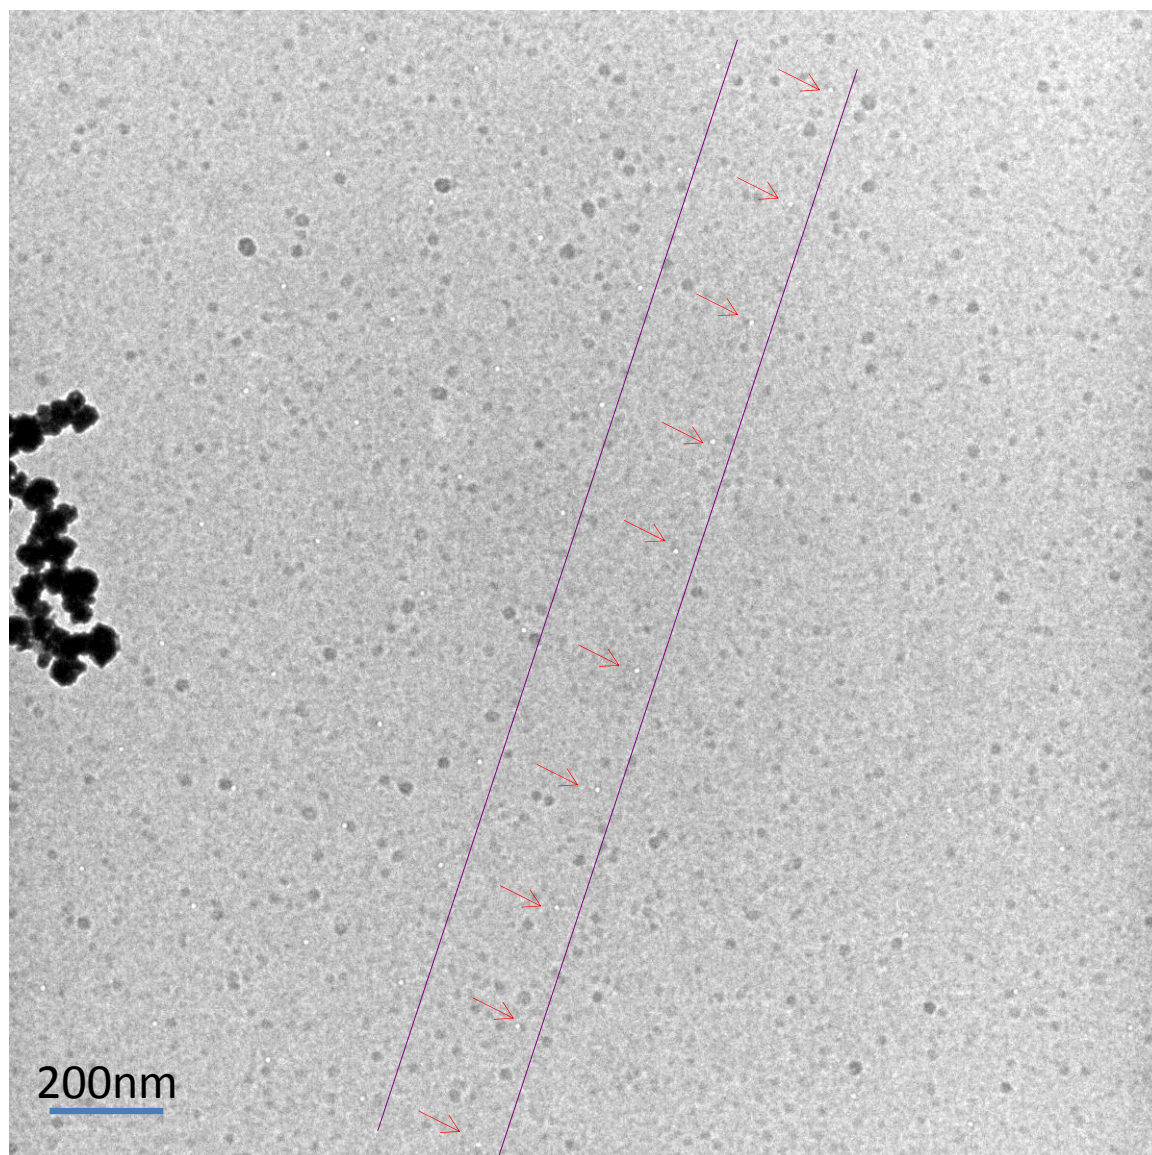

Figure S2. TEM images of overall view of 10×5 array: purple lines meaning x-direction and red arrows meaning nanopore locations.



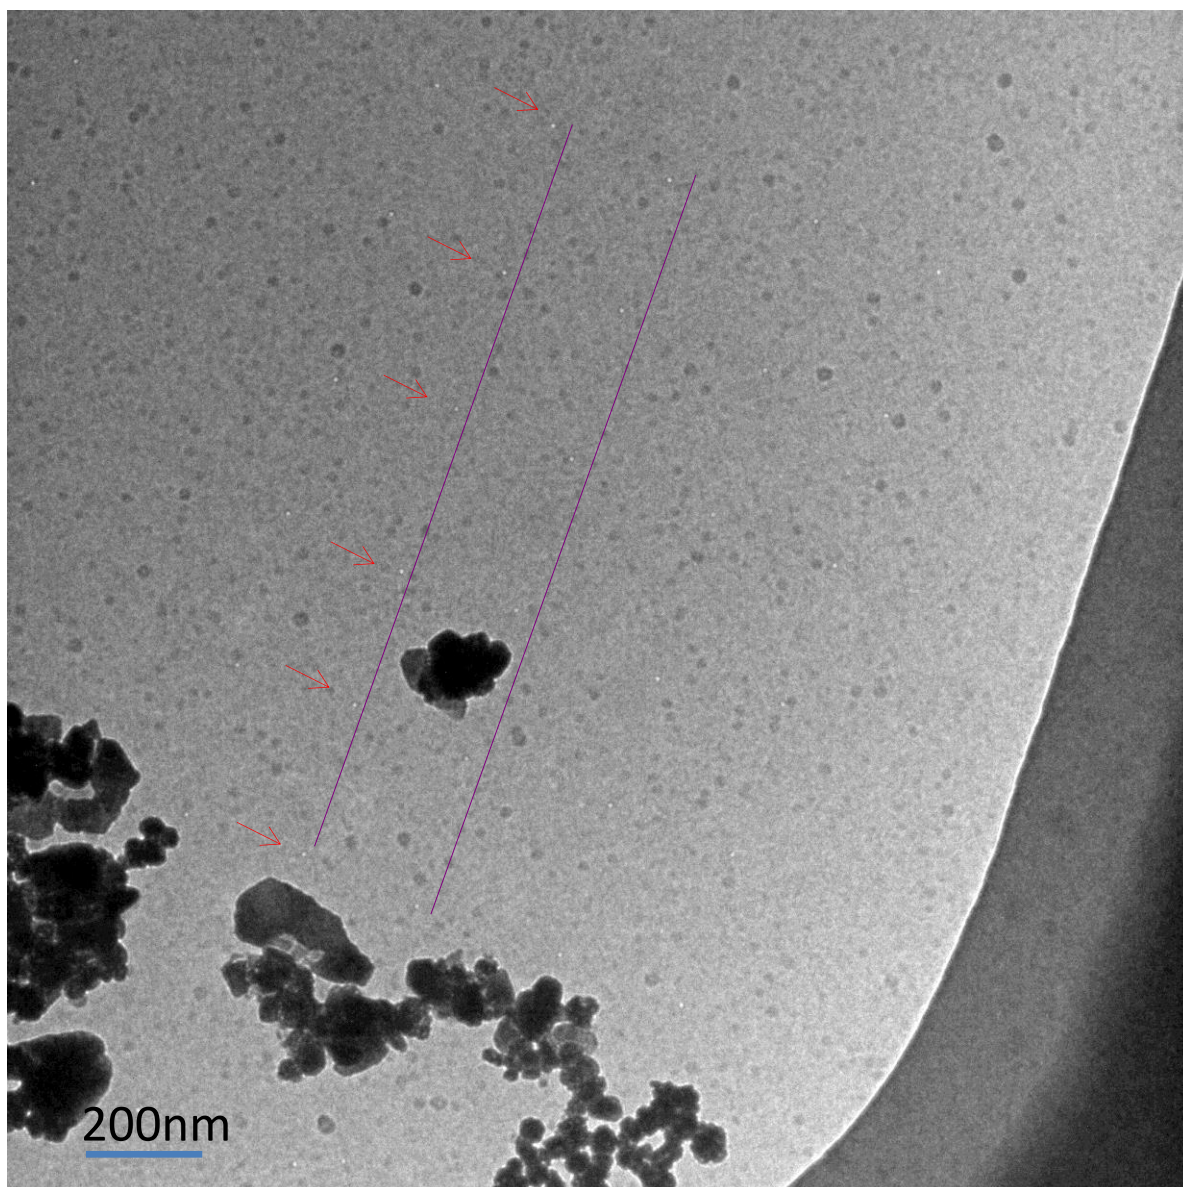

Figure S3. TEM images of overall view of 6×5 array: purple lines meaning x-direction and red arrows meaning nanopore location.

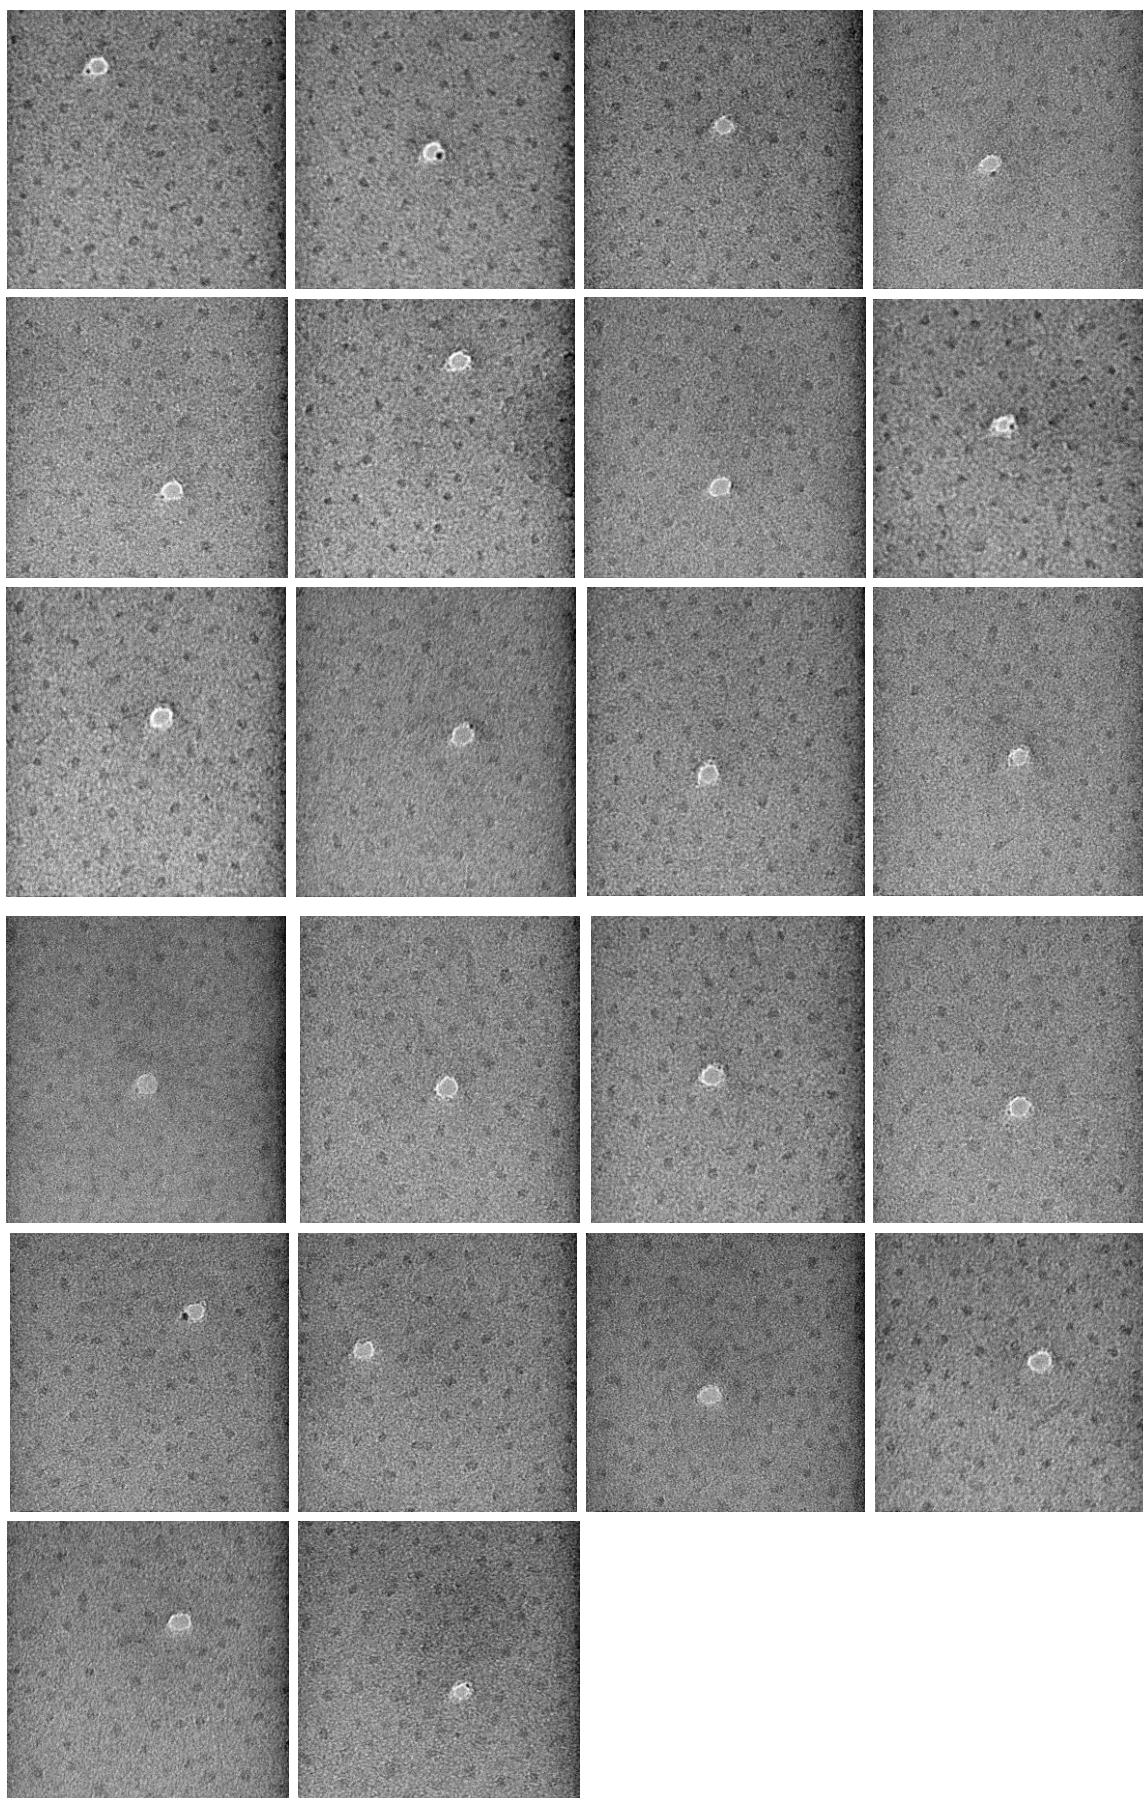

Figure S4. TEM images of 22 individual nanopores in  $6 \times 5$  arrays with exposure time 0.3s. The field of view of image is 90nm.

Table S1. Nanopore dimensions (long axis  $\times$  short axis, nm) from TEM images for exposure time 0.3s

| 1                | 2                | 3                | 4                | 5                | 6                | 7                | 8                | 9                | 10               | 11               |
|------------------|------------------|------------------|------------------|------------------|------------------|------------------|------------------|------------------|------------------|------------------|
| 5.4 $\times$ 5.0 | 5.9 $\times$ 4.7 | 5.0 $\times$ 4.9 | 5.9 $\times$ 4.7 | 6.5 $\times$ 5.9 | 5.7 $\times$ 5.4 | 7.0 $\times$ 5.7 | 7.1 $\times$ 6.3 | 7.1 $\times$ 5.0 | 6.7 $\times$ 5.9 | 6.2 $\times$ 5.8 |
| 12               | 13               | 14               | 15               | 16               | 17               | 18               | 19               | 20               | 21               | 22               |
| 6.7 $\times$ 5.0 | 6.1 $\times$ 5.8 | 6.1 $\times$ 5.3 | 6.0 $\times$ 5.5 | 6.0 $\times$ 5.5 | 7.0 $\times$ 5.8 | 6.2 $\times$ 6.2 | 6.2 $\times$ 6.1 | 7.0 $\times$ 5.5 | 6.6 $\times$ 5.4 | 6.2 $\times$ 5.2 |

Table S2. Nanopore dimensions (long axis  $\times$  short axis, nm) from TEM images for exposure time 0.5s.

| 1                | 2                | 3                | 4                | 5                | 6                | 7                 | 8                 | 9                | 10                |
|------------------|------------------|------------------|------------------|------------------|------------------|-------------------|-------------------|------------------|-------------------|
| 7.8 $\times$ 6.7 | 8.9 $\times$ 6.7 | 8.8 $\times$ 6.7 | 8.0 $\times$ 6.4 | 8.3 $\times$ 6.6 | 9.5 $\times$ 6.9 | 8.8 $\times$ 7.2  | 7.8 $\times$ 7.0  | 8.0 $\times$ 6.5 | 9.3 $\times$ 7.0  |
| 11               | 12               | 13               | 14               | 15               | 16               | 17                | 18                | 19               | 20                |
| 9.5 $\times$ 8.2 | 9.5 $\times$ 7.2 | 8.7 $\times$ 7.2 | 8.5 $\times$ 8.0 | 8.3 $\times$ 7.7 | 9.7 $\times$ 6.5 | 9.6 $\times$ 7.0  | 9.1 $\times$ 6.5  | 8.0 $\times$ 7.0 | 8.4 $\times$ 7.8  |
| 21               | 22               | 23               | 24               | 25               | 26               | 27                | 28                | 29               | 30                |
| 9.2 $\times$ 7.7 | 9.7 $\times$ 8.4 | 8.4 $\times$ 8.1 | 8.2 $\times$ 7.8 | 7.9 $\times$ 7.5 | 7.6 $\times$ 7.2 | 10.3 $\times$ 7.2 | 10.5 $\times$ 6.8 | 9.6 $\times$ 7.1 | 10.0 $\times$ 6.7 |

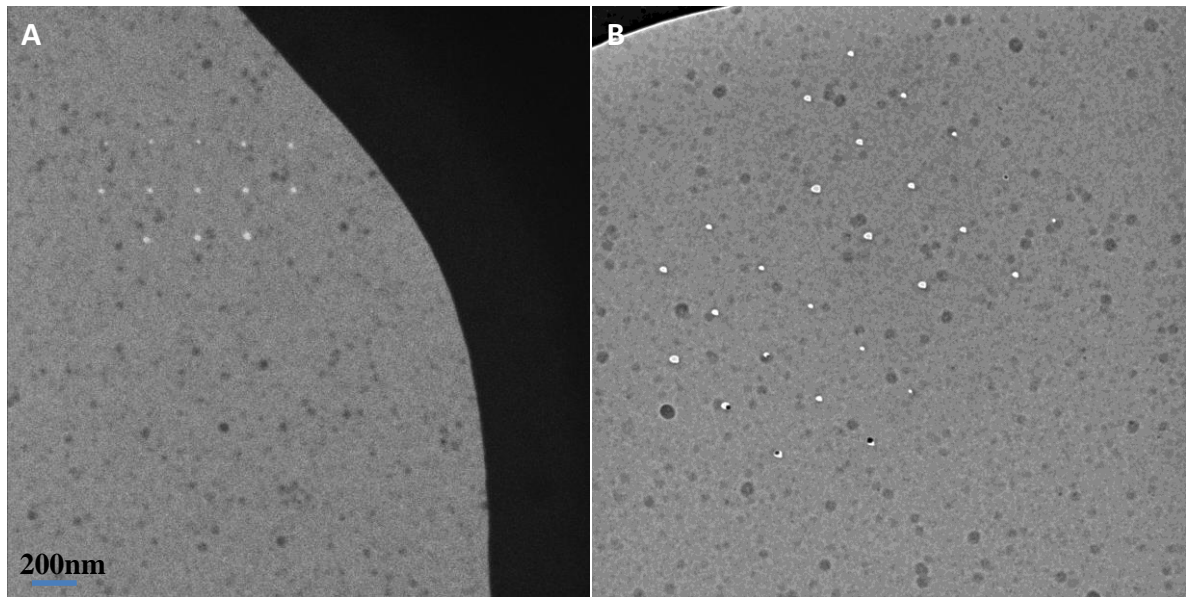

Figure S5. Images for nanopore arrays with exposure time series (A) quick HIM images after 1<sup>st</sup> milling of the array ; (B) TEM images for two arrays.



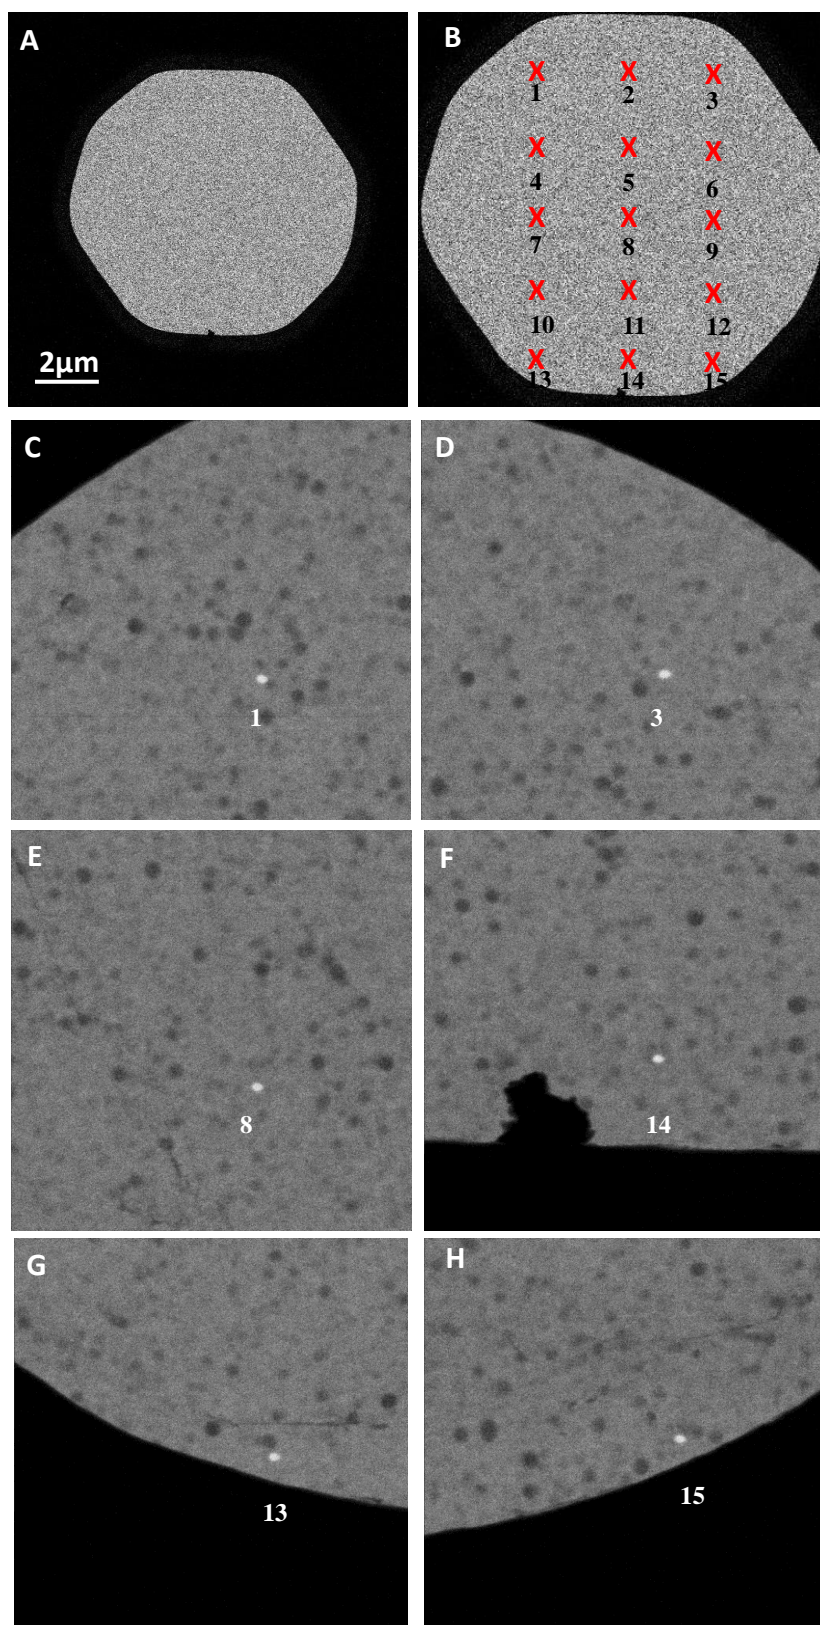

Figure S6. HIM images for 3×5 arrays with automated milling and imaging mode using exposure time 10s: (A) overall disc view; (B) positions of 3×5 arrays; (C) nanopore on position #1; (D) nanopore on position #3; (E) nanopore on position #8; (F) nanopore on position #14; (G) nanopore on position #13; (H) nanopore on position #15. The field of view for (C)-(H) is 2μm.
